# Supplementary material for: An expression atlas of human primary cells: inference of gene function from coexpression networks
Source: PubMed Central journal article supplement (PMC3849585; doi:10.1186/1471-2164-14-632), 2013-09-20

Figure S1: Mabbott *et al.*

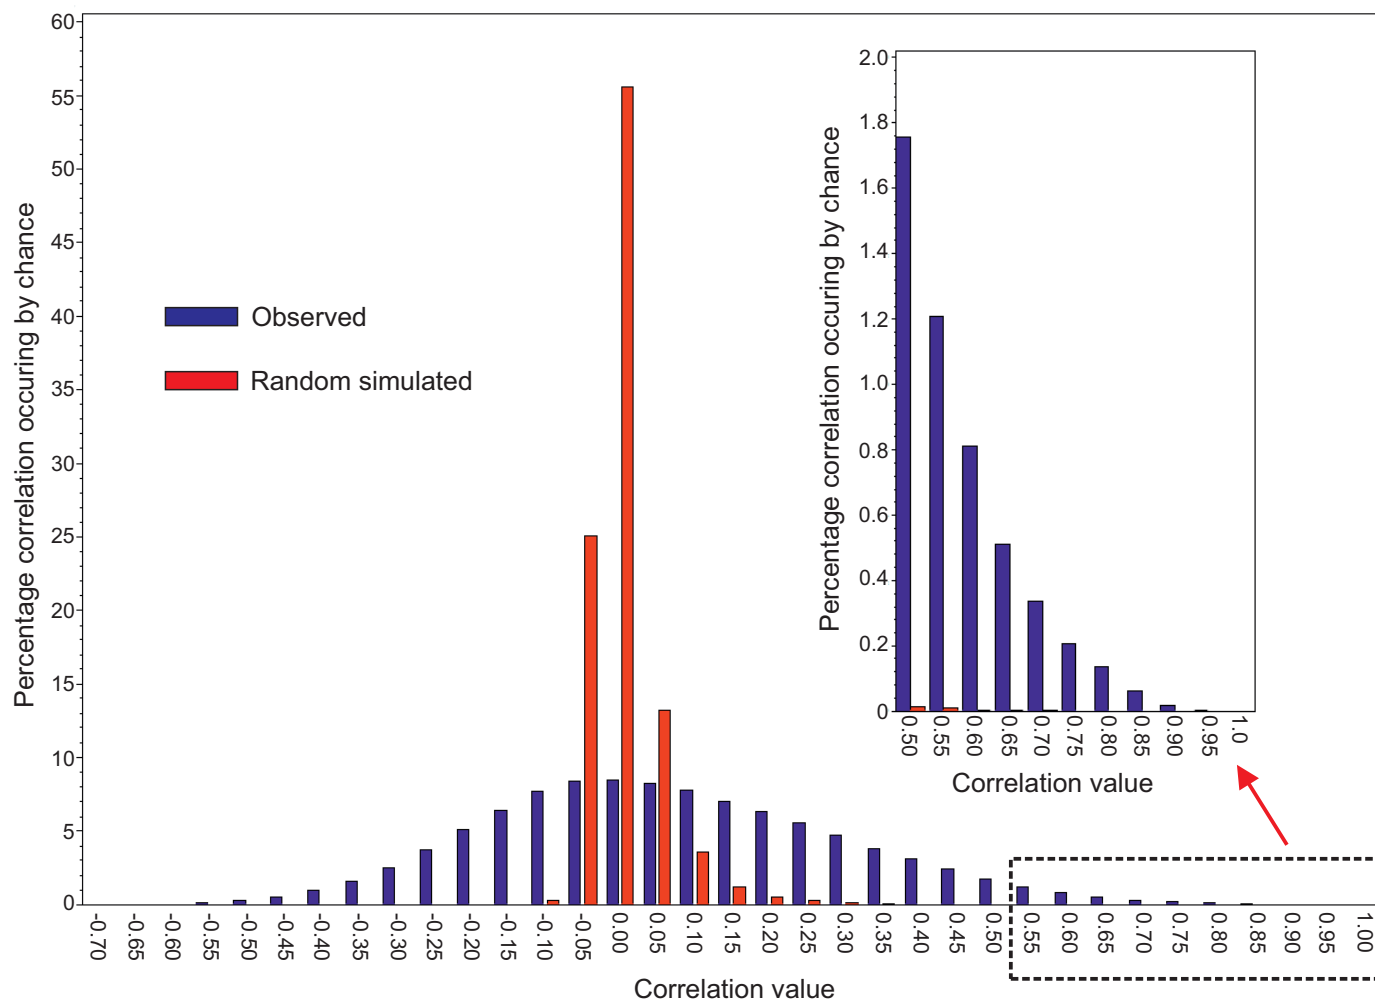

Supplement: 1471-2164-14-632-S3.pdf [file 1471-2164-14-632-S3.pdf]
